Classification:  
Biological Sciences  
Neuroscience

**Neurobehavioural Correlates of Obesity are Largely Heritable**  
**Short title: Heritable neurobehavioural correlates of obesity**

Uku Vainik<sup>1,2</sup>, Travis Baker<sup>1,3</sup>, Mahsa Dadar<sup>1</sup>, Yashar Zeighami<sup>1</sup>, Andréanne Michaud<sup>1</sup>, Yu Zhang<sup>1</sup>, José C. García Alanis<sup>1,4</sup>, Bratislav Misic<sup>1</sup>, D. Louis Collins<sup>1</sup>, Alain Dagher\*<sup>1</sup>

<sup>1</sup>. Montreal Neurological Institute, McGill University, Montreal, Quebec, H3A 2B4, Canada

<sup>2</sup>. Institute of Psychology, University of Tartu, Näituse 2, 50409, Tartu, Estonia

<sup>3</sup>. Center for Molecular and Behavioral Neuroscience, Rutgers University, 197 University Avenue, Newark, New Jersey, 07102, USA

<sup>4</sup>. Neuropsychology Section, Experimental and Biological Psychology, Department of Psychology, Philipps University of Marburg, Gutenbergstraße 18, 35032 Marburg, Germany

\* corresponding author: [alain.dagher@mcgill.ca](mailto:alain.dagher@mcgill.ca)

## Abstract

Recent molecular genetic studies have shown that the majority of genes associated with obesity are expressed in the central nervous system. Obesity has also been associated with neurobehavioural factors such as brain morphology, cognitive performance, and personality. Here, we tested whether these neurobehavioural factors were associated with the heritable variance in obesity measured by body mass index (BMI) in the Human Connectome Project (N=895 siblings). Phenotypically, cortical thickness findings supported the “right brain hypothesis” for obesity. Namely, increased BMI associated with decreased cortical thickness in right frontal lobe and increased thickness in the left frontal lobe, notably in lateral prefrontal cortex. In addition, lower thickness and volume in entorhinal-parahippocampal structures, and increased thickness in parietal-occipital structures in obese participants supported the role of visuospatial function in obesity. Brain morphometry results were supported by cognitive tests, which outlined obesity’s negative association with visuospatial function, verbal episodic memory, impulsivity, and cognitive flexibility. Personality-obesity correlations were inconsistent. We then aggregated the effects for each neurobehavioural factor for a behavioural genetics analysis and demonstrated the factors’ genetic overlap with obesity. Namely, cognitive test scores and brain morphometry had 0.25 - 0.45 genetic correlations with obesity, and the phenotypic correlations with obesity were 77-89% explained by genetic factors. Neurobehavioural factors also had some genetic overlap with each other. In summary, obesity has considerable genetic overlap with brain and cognitive measures. This supports the theory that obesity is inherited via brain function, and may inform intervention strategies.

## Significance Statement

Obesity is a widespread heritable health condition. Evidence from psychology, cognitive neuroscience, and genetics has proposed links between obesity and the brain. The current study tested whether the heritable variance in obesity is explained by brain and behavioural factors in a large brain imaging cohort that included multiple related individuals. We found that the heritable variance in obesity had genetic correlations 0.25 - 0.45 with cognitive tests, cortical thickness, and regional brain volume. In particular, obesity was associated with frontal lobe asymmetry and differences in temporal-parietal perceptual systems. Further, we found genetic overlap between

51 certain brain and behavioural factors. In summary, the genetic vulnerability to obesity is  
52 expressed in the brain. This may inform intervention strategies.

53 \body

54

## Introduction

Obesity is a widespread condition leading to increased mortality (1) and economic costs (2). Twin and family studies have shown that individual differences in obesity are largely explained by genetic variance (3). Gene enrichment patterns suggest that obesity-related genes are preferentially expressed in the brain (4). While it is unclear how these brain-expressed genes lead to obesity, several lines of research show that neural, cognitive, and personality differences have a role in vulnerability to obesity (5, 6). Here we seek to test whether these neurobehavioural factors could explain the genetic variance in obesity.

In the personality literature, obesity is most often negatively associated with Conscientiousness (self-discipline and orderliness) and positively with Neuroticism (a tendency towards negative affect) (7). In the cognitive domain, tests capturing executive function, inhibition, and attentional control have a negative association with obesity (5–8). Neuroanatomically, obesity seems to have a negative association with the grey matter volume of prefrontal cortex, and to a lesser extent the volume of parietal and temporal lobes, as measured by voxel based morphometry (9). It has also been suggested that structural and functional asymmetry of the prefrontal cortex might underlie overeating and obesity (10). For genetic analysis, cortical thickness estimates of brain structure from Magnetic Resonance Imaging (MRI) have been preferred over volumetric measures (11). However, to date, reports of cortical thickness patterns associated with obesity have been inconsistent (12, 13). As a prerequisite to our goal of ascertaining the heritability of brain-based vulnerability to obesity, we sought to extend previous neurobehavioural findings in a large multi-factor dataset from the Human Connectome Project (HCP). Since cortical thickness measurement is limited to cortex only, we also measured volumetric estimates of medial temporal lobe and subcortical structures, which have been implicated in appetitive control (e.g., 14).

The main goal was to assess whether the outlined obesity-neurobehavioural associations are of genetic or environmental origin. Recent evidence from behavioural and molecular genetics suggests that there is considerable genetic overlap between obesity, cognitive test scores, and brain imaging findings (15–20). However, the evidence so far is not comprehensive across all neurobehavioural factors discussed. A recent paper assessed the heritability of obesity-associated regional brain volumes (21). However, the study did not analyze the heritability of the association

between brain and obesity. The latter analysis is crucial for understanding whether brain anatomy and obesity could have a genetic overlap, which would suggest that the heritability of vulnerability to obesity is expressed in the brain.

In addition, we sought to estimate the genetic overlap between the different BMI-related neurobehavioural factors. On one hand, performance on cognitive tests and personality must originate from the brain (e.g., 22), and therefore personality and cognition could be expected to explain brain-morphometry associations with BMI (6). On the other hand, brain-behaviour associations are far from certain (23), and even different measurement traditions in both behaviour (personality and cognitive tests) and brain morphometry (cortical thickness or brain volume) are often conceptualized as providing independent sources of information (7, 11). Documenting the degree of genetic overlap between behavioural and brain measures would shed light on whether similar underlying processes lead to obesity's associations with different neurobehavioural factors.

Taken together, the goal of the current analysis was to use a large multifactor dataset to analyze the heritability of the associations between obesity and brain/behaviour. We further tested genetic overlap between the different neurobehavioural factors themselves.

## Results

### Background

We analyzed data from 895 participants from the Human Connectome Project S900 release (24), including 111 pairs of monozygotic twins and 188 pairs of dizygotic twins and siblings. Similarly to many previous reports (3) we modelled BMI heritability with the AE model (A: additive genetics and E: unique environment), as opposed to the ACE model (C: common environment), as AE had the lowest Akaike Information Criterion (Table S10). BMI heritability was  $A=71\%$  [95% CI: 61%;78%], which is close to the published meta-analytic estimate ( $A=75\%$ , 3).

In all analyses below, we controlled for age, gender, race, ethnicity, handedness, and evidence of drug consumption on day of testing, which mostly associated with BMI (SI Results, Figure S2). When presenting and interpreting phenotypic associations, we controlled for family structure to

avoid inflated effect sizes and standard errors (e.g., 25). The behavioural genetics analysis did not control for family structure, since this information is needed for modelling heritability. As socioeconomic status (SES) is intertwined with cognitive test scores (26), personality (27), and brain morphometry (28), we also present phenotypic associations controlling for SES (education and income) in the supplementary material. All in-text p-values are provided without correcting for multiple comparisons. False discovery rate (FDR) correction was applied when screening for features within cognitive, personality, and brain factors (Figures 1,2,5).

## **Cognitive and Personality Factors**

BMI was negatively correlated with these tests of executive function: cognitive flexibility, fluid intelligence, inability to delay gratification, reading abilities, and working memory. Intriguingly, the strongest effects were present for non-executive tasks measuring visuospatial ability and verbal memory (Figure 1A). These tasks remained associated with BMI after controlling for SES; controlling for SES reduced the number of executive function tests involved with BMI to cognitive flexibility and inability to delay gratification (SI Figure S3A left). No personality test score correlated with BMI when FDR correction was applied (Figure 1B).

## **Brain Morphology**

Cortical thickness was estimated from each T1-weighted MRI using CIVET 2.0 software (29). Parcel-based analysis identified negative associations with BMI in right inferior lateral frontal cortex, and bilateral entorhinal-parahippocampal cortex (Figures 2A & 3A). Positive associations with BMI were found with the left superior frontal cortex, left inferior lateral frontal cortex, and bilateral parietal cortex parcels. Controlling for SES did not change these results (Figure S4A left). The frontal lobe asymmetry in the BMI association (thinner on the right, thicker on the left) mostly involved the inferior lateral prefrontal areas, such as inferior frontal gyrus.

Regional brain volumes were measured for estimation of brain morphology-obesity associations in brain structures not covered by the CIVET cortical thickness algorithm. Medial temporal lobe and subcortical volumes were individually segmented and measured by registering each brain to a labelled atlas using ANIMAL software (30). Volumetric results demonstrated an association

between BMI and lower volume of the entorhinal cortex bilaterally, and a positive association of left amygdala volume with BMI (Figures 2B & 3B). No subcortical region had a significant association with BMI, and results did not change when controlling for SES (Figure S4B left).

## Creating poly-phenotype scores

We performed dimension reduction for heritability analyses to reduce measurement noise and avoid multiple testing with redundant measures. Similarly to other recent papers, (20, 27), we used the weights of each individual feature within a neurobehavioural factor (personality test, cognitive test, brain parcel) to create an aggregate BMI risk score or *poly-phenotype score (PPS)*. This is similar to the polygenic score approach in genetics, where the small effects of several polymorphisms are aggregated to yield a total effect score (15, 19, 20, 27). We used the correlation values as weights to multiply each participant's scaled measurements, and aggregated the results into a single composite variable, the PPS. The PPS reflects the total association of each neurobehavioural factor with BMI. To avoid overfitting, we assigned each 10% of participants the PPS weights obtained from the other 90% (see SI: Data analysis for details).

The associations between BMI and the PPS-s for cognition (correlation with BMI:  $r=0.16$ ,  $p<0.001$ ,  $n=798$ ) and personality ( $r=0.08$ ,  $p=0.017$ ,  $n=888$ ) are slightly higher than the meta-analytic estimates of the pooled association between BMI and cognitive test scores ( $r=0.10$ , ref: 8) and personality factors ( $r=0.05$ , ref: 8). BMI had stronger associations with the PPS-s for cortical thickness ( $r=0.26$ ,  $p<0.001$ ,  $n=591$ ), and medial temporal brain volume ( $r=0.23$ ,  $p<0.001$ ,  $n=594$ ). There was no association between BMI and subcortical brain volume ( $r=-0.05$ ,  $p=0.169$ ,  $n=828$ ). To test the generalizability of the PPS approach, we used weights obtained from the full S900 release (Figures S3 right and S4 right) to test PPS-BMI correlation amongst the unseen additional participants in the S1200 release (referred to as S1200n,  $n=236$ ). Cortical thickness PPS had essentially unchanged effect size when correlated with BMI in S1200n (SI Results, Figure S7). At the same time, cognitive and personality PPS-s were less stable (SI Results, Figure S7), likely because the smaller effect sizes of individual features need larger training datasets to reduce inaccuracies, or that the true PPS-BMI effect size was too small to be found just within the S1200n sample.

## Heritability

Bivariate heritability was similarly conducted with the AE model, since the main goal was to explain variance in BMI, for which AE was the best model. All PPS-s were found to be highly heritable, with the A component explaining 36-79% of the variance (Figure 4A, SI Table S11). Significant genetic correlations ( $r_g$ ) were found between BMI and cognitive test scores ( $r_g=0.25$  ( $p=0.002$ ), cortical thickness ( $r_g=0.45$ ,  $p<0.001$ ), and medial temporal brain volume ( $r_g=0.36$ ,  $p<0.001$ ) (Figure 4B, SI Table S12). The personality PPS genetic correlation with BMI was not significant ( $r_g=0.22$ ,  $p=0.052$ ). Molecular evidence relying on linkage disequilibrium score regression has reported effects of similar magnitude between higher cognitive test scores and BMI ( $r_g=-0.22$ , ref: , 15,  $r_g=-0.18$ , ref: , 18). Environmental correlations (i.e. correlations between environmental variances) were small and not significant (SI Table S12). As expected from high heritability of the traits and high genetic correlations, the phenotypic BMI-PPS correlations described in the previous sections were 77-89% explained by genetic factors (Figure 4C, SI Table S11). The results broadly replicated when repeating the analysis with just the top features within a PPS, suggesting that PPS based findings summarize the effects of the underlying individual features (Figure S8). We further replicated the heritability patterns in a separate analysis focused only on the additional participants from the S1200 HCP release (Figure S9).

## Genetic overlap between neurobehavioural factors

Phenotypically, certain PPS-s had small but significant intercorrelations (Figure S10 upper triangle). After FDR correction, we were able to find two genetic correlations between PPS-s of cognition and cortical thickness ( $r_g=0.35$ ), as well as cognition and personality ( $r_g=0.33$ , Figure S10 lower triangle). Taken together, while the neurobehavioural factors have mostly independent effects on BMI, cognitive test scores have small genetic overlap with brain structure and personality.

## Discussion

Cortical thickness, medial temporal lobe volume, and cognitive measures all had covariation with BMI, and their effect on BMI was almost entirely heritable. Similarly, we found genetic correlations between obesity risk scores of cognition, cortical thickness and personality. Together, our results from a large sample support the role of brain and psychological constructs in explaining genetic variance in obesity.

BMI correlated with increased cortical thickness in the left prefrontal cortex and decreased thickness in the right prefrontal cortex, supporting the “right brain” hypothesis for obesity (10). The effect was most prominent in the inferior frontal gyrus (Figures 2A and 3A). Only preliminary support for the right brain hypothesis has been previously available (13). Right prefrontal cortex has been implicated in inhibitory control (22) and possibly bodily awareness (10). Many neuromodulation interventions (e.g. transcranial magnetic stimulation) aimed at increasing self-regulation capacity often target right prefrontal cortex. On the other hand, effects have also been demonstrated in studies targeting left prefrontal cortex (31).

Cortical thickness results also highlighted the role of temporo-parietal perceptual structures in obesity. Namely, obesity was associated with bilaterally decreased thickness of the parahippocampal and entorhinal cortices, and with mostly right-lateralized increased thickness of parietal and occipital lobes. Volumetric results within the medial temporal lobe supported the role of entorhinal cortex and also suggested that obesity is positively associated with the volume of left amygdala. Emergence of the effects of the right parietal structures together with right prefrontal structures hint at the role of the ventral frontoparietal network, thought to be especially important for detection of behaviourally relevant visual stimuli (32). The parahippocampal and entorhinal cortex are associated with episodic memory and context mediation (33). Similarly, the hippocampus has been associated with the modulation of food cue reactivity by homeostatic and contextual information, and hippocampal dysfunction is postulated to promote weight gain in the western diet environment (34). The amygdala is implicated in emotional and appetitive responses to sensory stimuli, including food cues (35).

Integrating these findings, one could envision a model where obesity is associated with a certain

cognitive profile (36). The model starts with a hyperactive visual attention system attributing heightened salience to food stimuli, implicating the ventral visual stream and amygdala. These signals are then less optimally tied into relevant context by the parahippocampal and entorhinal structures, and less well moderated (or filtered) by the prefrontal executive system. This could result in consummatory behaviour driven by the presence of appetitive food signals, which are ubiquitous in our obesogenic environment. An impaired response inhibition and salience attribution model of obesity has been suggested based on the functional neuroimaging literature. Namely, functional MRI studies have consistently identified obesity to associate with heightened salience response to food cues, coupled with reduced activation in prefrontal and executive systems involved in self-regulation and top-down attentional control (e.g., 35). A similar conclusion emerged from a recent resting state network analysis of the HCP data (37), in which obesity was associated with alterations in perceptual networks and decreased activity of default mode and central executive networks.

This brain morphology-derived model has some support from cognitive tests. The role of prefrontal executive control is outlined by our finding of obesity's negative association with scores on several executive control tasks. Surprisingly, there was no effect of motor inhibition as measured by the Flanker inhibitory task. A relation between obesity and reduced motor inhibition, while often mentioned, has been inconsistent even across meta analyses (7, 8). On the other hand, we found a relationship between decisional impulsivity, measured by delay-discounting, and BMI, replicating previous literature (6, 7, 18). While controlling for education reduced the number of executive tasks associated with BMI, the overall pattern remained the same, suggesting that education level is a proxy for certain executive function abilities.

Intriguingly, obesity was found to be negatively associated with spatial orientation and verbal episodic memory. These tasks tap into the key functions associated with entorhinal and parahippocampal regions implicated in our study (33). Therefore, both cognitive and brain morphology features propose that the increased salience of food stimuli could be facilitated by dysregulated context representation in obesity.

Regarding personality, we were unable to find any questionnaire-specific effects, notably with respect to Neuroticism and Conscientiousness, both often thought to be associated with obesity

(5–7). There are potential explanations for this discrepancy. First, the meta-analytical association between various personality tests and BMI is small ( $r=0.05$ , ref: 7), for which we might have been underpowered after p-value correction. Second, controlling for family structure likely further reduced the effect sizes (25). Third, the personality-obesity associations tend to pertain to more specific facets and nuances than broad personality traits (38), therefore, further analysis with more detailed and eating-specific personality measures is needed in larger samples.

All the associations discussed here were largely due to shared genetic variance between neurobehavioural factors and BMI. This is in accordance with recent molecular genetics evidence that 75% of obesity related genes express preferentially in the brain (4). Similarly, the genetic correlation between cognition and BMI uncovered in our sample is at the same magnitude as molecular estimates of associations between more specific cognitive measures and BMI (15, 18). The current evidence further supports the brain-gene association with obesity vulnerability.

A possible explanation of the genetic correlations is pleiotropy – the existence of a common set of genes that independently influence variance in both obesity and brain function. However, our results could also support a causal relationship – that the genetic correlation is due to a persistent effect of heritable brain factors on overeating and hence BMI. For instance, we could hypothesize that the heritable obesity-related cognitive profile promotes overeating when high-calorie food is available. As high-calorie food is abundant and inexpensive, the cognitive profile could lead to repeated overeating providing an opportunity for genetic obesity-proneness to express. Such longitudinal environmental effects of a trait need not to be large, they just have to be consistent (39, see discussion in 40). Of course, a reverse scenario is also possible – obesity leads to alterations in cortical morphology due to the consequences of cardiometabolic complications, including low-grade chronic inflammation, hypertension, and vascular disease (reviewed in 9, 41). However, we find this hypothesis less plausible in our study for two reasons. First, the reviews outline that the reported consequence of chronic visceral adipose tissue accumulation is typically global brain atrophy. In contrast, the current data implicate focal brain effects – vascular or inflammatory neurodegenerative effects would not explain the left-right asymmetry in the prefrontal cortex, nor the many areas of gray matter increase with BMI. Second, the same reviews suggest that global brain atrophy due to metabolic syndrome is mostly seen in older participants, whereas the current sample had a mean age of 29. Young adults often experience

“healthy or transitional obesity”, where clinical inflammation levels (42) and other cardiometabolic comorbidities have not yet developed (43). Further, a recent mendelian randomisation study suggested that low genetic potential for education (a proxy for cognitive test score, compare Figure 1A with Figure S3A left) leads to high risk for cardiovascular disease, whereas high genetic risk for cardiovascular disease (outcome of high BMI) does not lead to low education (44). A likely explanation of these findings is that even if the cardiovascular disease (and BMI) genes have effects on cognition via neurodegenerative mechanisms, these genes have an effect later in life, when people have completed their education. Taken together, the focality of the cortical thickness patterns and young age of the participants suggest that the genetic neurobehavioural factors described here lead to a higher risk of obesity.

We found neurobehavioural PPS-s to have occasional phenotypic and genetic correlations with each other. Here, it is hard to argue against pleiotropy playing a role. While one could reasonably expect that at least part of the variation in cognitive performance would be shaped by brain morphometry (22), it is also the case that engaging in education leads to improvement in cognitive test scores (26) and might also lead to changes in cortical thickness (45). The small genetic overlap between cognition, cortical thickness and personality can probably be explained by common pleiotropic roots. At the same time, integrating morphometry and cognitive findings is difficult with this dataset.

From a practical point of view, our work suggests that evidence from psychology and neuroscience can be used to design intervention strategies for people with higher genetic risk for obesity. One way would be modifying neurobehavioural factors, e.g. with cognitive training, to improve people’s ability resist the obesogenic environment (31, 36). Another path could be changing the immediate environment to be less obesogenic (e.g., 46) so that individual differences in neurobehavioural factors would be less likely to manifest. In any case, current evidence highlights that obesity interventions should not focus solely on diet, but also take into account that obesity is genetically intertwined with variation in neurobehavioural profiles.

The current analysis has limitations. Due to the cross-sectional nature of the dataset, causality between neurobehavioural factors and obesity is only suggestive – longitudinal designs would enable better insight into the causal associations between brain morphology, psychological

measures, and BMI or weight gain. BMI is a crude proxy for actual eating behaviours or health status. In addition, there were more normal-weight than obese participants. However, the 25% obesity rate in this sample is close to the published obesity rate of the state of Missouri (31.7%) and the US (36.5%, ref: , 47). Also, we expect that BMI itself and the neurobehavioural mechanisms behind it are continuum processes, therefore all variation in the range from normal-weight to obesity is likely helping to uncover underlying associations. While the measurement of cognition and personality was exhaustive, it lacked some common behavioural tasks like the stop-signal task, or common questionnaires measuring self-control, impulsivity, and eating-specific behaviours that have been previously associated with body weight (5, 6). Particularly, the common eating-specific behaviours such as uncontrolled eating (48) are likely better candidates for explaining brain morphology-BMI associations as they are more directly related to the hypothesized underlying behaviour.

One has to be careful in translating individual differences in cortical thickness in normal populations to underlying neural mechanisms. Diverse biological processes have been suggested to influence MRI-based cortical thickness measures, ranging from synaptic density to apparent thinning due to synaptic pruning and myelination (summarized in 49, 50). A definitive model of the underlying mechanism that links normal variations in cortical thickness to differences in brain function cannot be given, as cortical thickness has not been mapped with both MRI and histology in humans (50). Still, the associations between cortical thickness and BMI in one sample were able to predict BMI in a new separate sample, suggesting that the pattern is robust. Our conceptual interpretation of the meaning of cortical thickness patterns has support from measures of both brain structure and cognitive function.

Relying on PPS-s prevented us from analyzing detailed interactions between cortical thickness and cognitive function in their genetic overlap with each other. However, given the relatively small associations between PPS-s, and the number of candidate measures that could be expected to interact with one another, we believe it would have been hard to find an association that would have survived multiple testing correction. Future, focused, hypothesis-driven studies have to further elucidate the neurobehavioural mechanisms behind obesity proneness.

In summary, the current analysis provides comprehensive evidence that the obesity-related

differences in brain structure and cognitive tests are largely due to shared genetic factors. Genetic factors also explain occasional overlap between neurobehavioural factors. We hope that increasingly larger longitudinal data sets and dedicated studies will help to outline more specific neurobehavioural mechanisms that confer vulnerability to obesity, and provide a basis for designing informed interventions.

## Methods

Data were provided by the Human Connectome Project (24). Certain people were excluded due to missing data or not fulfilling typical criteria. Exclusion details, demographics and family structure are summarized in SI Methods and Table S1. Software pipelines for obtaining features of cortical thickness and brain volume are described in SI Methods. Analysis scripts to reproduce results presented are available at: [osf.io/htx7u](https://osf.io/htx7u).

Figure S1 provides a schematic pipeline for data analysis. Details of each data analysis step are outlined in SI Methods. We describe how PPS weights are obtained through cross-validation and how the weights generalize to a separate dataset (S1200n). We further describe the main principles of twin and sibling-based heritability analysis and replication of these findings using individual features instead of PPS-s, and replication in a separate dataset (S1200n). Finally, the software and packages used are listed.

## References

1. Angelantonio ED, et al. (2016) Body-mass index and all-cause mortality: individual-participant-data meta-analysis of 239 prospective studies in four continents. *The Lancet* 388(10046):776–786.
2. Hammond RA, Levine R (2010) The economic impact of obesity in the United States. *Diabetes Metab Syndr Obes Targets Ther* 3:285–295.
3. Elks CE, et al. (2012) Variability in the heritability of body mass index: a systematic review and meta-regression. *Genomic Endocrinol* 3:29.
4. Locke AE, et al. (2015) Genetic studies of body mass index yield new insights for obesity biology. *Nature* 518(7538):197–206.
5. Michaud A, Vainik U, Garcia-Garcia I, Dagher A (2017) Overlapping Neural Endophenotypes in Addiction and Obesity. *Front Endocrinol* 8.

doi:10.3389/fendo.2017.00127.

6. Vainik U, Dagher A, Dubé L, Fellows LK (2013) Neurobehavioural correlates of body mass index and eating behaviours in adults: A systematic review. *Neurosci Biobehav Rev* 37(3):279–299.
7. Emery RL, Levine MD (2017) Questionnaire and behavioral task measures of impulsivity are differentially associated with body mass index: A comprehensive meta-analysis. *Psychol Bull* 143(8):868–902.
8. Bartholdy S, Dalton B, O'Daly OG, Campbell IC, Schmidt U (2016) A systematic review of the relationship between eating, weight and inhibitory control using the stop signal task. *Neurosci Biobehav Rev* 64:35–62.
9. Willette AA, Kapogiannis D (2015) Does the brain shrink as the waist expands? *Ageing Res Rev* 20:86–97.
10. Alonso-Alonso M, Pascual-Leone A (2007) The right brain hypothesis for obesity. *JAMA J Am Med Assoc* 297(16):1819.
11. Winkler AM, et al. (2010) Cortical Thickness or Grey Matter Volume? The Importance of Selecting the Phenotype for Imaging Genetics Studies. *NeuroImage* 53(3):1135–1146.
12. Veit R, et al. (2014) Reduced cortical thickness associated with visceral fat and BMI. *NeuroImage Clin* 6:307–311.
13. Medic N, et al. (2016) Increased body mass index is associated with specific regional alterations in brain structure. *Int J Obes* 40(7):1177–1182.
14. Mole TB, Mak E, Chien Y, Voon V (2016) Dissociated Accumbens and Hippocampal Structural Abnormalities across Obesity and Alcohol Dependence. *Int J Neuropsychopharmacol* 19(9). doi:10.1093/ijnp/pyw039.
15. Marioni RE, et al. (2016) Assessing the genetic overlap between BMI and cognitive function. *Mol Psychiatry*. doi:10.1038/mp.2015.205.
16. Spieker EA, et al. (2015) Shared genetic variance between obesity and white matter integrity in Mexican Americans. *Front Genet* 6. doi:10.3389/fgene.2015.00026.
17. Rapuano KM, et al. (2017) Genetic risk for obesity predicts nucleus accumbens size and responsivity to real-world food cues. *Proc Natl Acad Sci* 114(1):160–165.
18. Sanchez-Roige S, et al. (2018) Genome-wide association study of delay discounting in 23,217 adult research participants of European ancestry. *Nat Neurosci* 21(1):16–18.
19. Lancaster TM, Ihssen I, Brindley LM, Linden DE (2018) Preliminary evidence for genetic overlap between body mass index and striatal reward response. *Transl Psychiatry* 8(1):19.
20. Opel N, et al. (2017) Prefrontal gray matter volume mediates genetic risks for obesity. *Mol*

- 400        *Psychiatry* 22(5):703–710.
- 401    21.    Weise CM, et al. (2017) The obese brain as a heritable phenotype: a combined  
402        morphometry and twin study. *Int J Obes* 41(3):458–466.
- 403    22.    Aron AR, Robbins TW, Poldrack RA (2014) Inhibition and the right inferior frontal cortex:  
404        one decade on. *Trends Cogn Sci* 18(4):177–185.
- 405    23.    Allen TA, DeYoung CG (2017) Personality Neuroscience and the Five Factor Model. *Oxf*  
406        *Handb Five Factor Model*. doi:10.1093/oxfordhb/9780199352487.013.26.
- 407    24.    Van Essen DC, et al. (2013) The WU-Minn Human Connectome Project: An Overview.  
408        *NeuroImage* 80:62–79.
- 409    25.    Kim J (2016) Personality traits and body weight: Evidence using sibling comparisons. *Soc*  
410        *Sci Med* 163:54–62.
- 411    26.    Ritchie SJ, Tucker-Drob E (2017) How much does education improve intelligence? A meta-  
412        analysis. *PsyArXiv*. doi:10.17605/OSF.IO/KYMHP.
- 413    27.    Möttus R, Realo A, Vainik U, Allik J, Esko T (2017) Educational Attainment and  
414        Personality Are Genetically Intertwined. *Psychol Sci*:0956797617719083.
- 415    28.    Noble KG, et al. (2015) Family income, parental education and brain structure in children  
416        and adolescents. *Nat Neurosci* 18(5):773–778.
- 417    29.    Ad-Dab’bagh Y, et al. (2006) The CIVET image-processing environment: a fully automated  
418        comprehensive pipeline for anatomical neuroimaging research. *Proceedings of the 12th*  
419        *Annual Meeting of the Organization for Human Brain Mapping* (Florence, Italy), p 2266.
- 420    30.    Collins DL, Evans AC (1997) Animal: Validation and Applications of Nonlinear  
421        Registration-Based Segmentation. *Int J Pattern Recognit Artif Intell* 11(08):1271–1294.
- 422    31.    Val-Laillet D, et al. (2015) Neuroimaging and neuromodulation approaches to study eating  
423        behavior and prevent and treat eating disorders and obesity. *NeuroImage Clin* 8:1–31.
- 424    32.    Corbetta M, Shulman GL (2002) Control of goal-directed and stimulus-driven attention in  
425        the brain. *Nat Rev Neurosci* 3(3):215–229.
- 426    33.    Aminoff EM, Kveraga K, Bar M (2013) The role of the parahippocampal cortex in  
427        cognition. *Trends Cogn Sci* 17(8):379–390.
- 428    34.    Hargrave SL, Jones S, Davidson TL (2016) The Outward Spiral: A vicious cycle model of  
429        obesity and cognitive dysfunction. *Curr Opin Behav Sci* 9:40–46.
- 430    35.    Neseliler S, Han J-E, Dagher A (2017) The Use of Functional Magnetic Resonance Imaging  
431        in the Study of Appetite and Obesity. *Appetite and Food Intake: Central Control*, ed Harris  
432        RBS (CRC Press/Taylor & Francis, Boca Raton (FL)). 2nd Ed.

36. Jansen A, Houben K, Roefs A (2015) A Cognitive Profile of Obesity and Its Translation into New Interventions. *Front Psychol* 6. doi:10.3389/fpsyg.2015.01807.
37. Doucet GE, Rasgon N, McEwen BS, Micali N, Frangou S (2017) Elevated Body Mass Index is Associated with Increased Integration and Reduced Cohesion of Sensory-Driven and Internally Guided Resting-State Functional Brain Networks. *Cereb Cortex*:1–10.
38. Vainik U, Möttus R, Allik J, Esko T, Realo A (2015) Are Trait–Outcome Associations Caused by Scales or Particular Items? Example Analysis of Personality Facets and BMI. *Eur J Personal* 29(6):688–634.
39. Dickens WT, Flynn JR (2001) Heritability estimates versus large environmental effects: The IQ paradox resolved. *Psychol Rev* 108(2):346–369.
40. Tucker-Drob EM, Harden KP (2012) Intellectual Interest Mediates Gene-by-SES Interaction on Adolescent Academic Achievement. *Child Dev* 83(2):743–757.
41. Guillemot-Legris O, Muccioli GG (2017) Obesity-Induced Neuroinflammation: Beyond the Hypothalamus. *Trends Neurosci* 40(4):237–253.
42. Cheng HL, et al. (2013) Iron, Hepcidin and Inflammatory Status of Young Healthy Overweight and Obese Women in Australia. *PLOS ONE* 8(7):e68675.
43. Cheng HL, Medlow S, Steinbeck K (2016) The Health Consequences of Obesity in Young Adulthood. *Curr Obes Rep* 5(1):30–37.
44. Tillmann T, et al. (2017) Education and coronary heart disease: mendelian randomisation study. *BMJ* 358:j3542.
45. Engvig A, et al. (2010) Effects of memory training on cortical thickness in the elderly. *NeuroImage* 52(4):1667–1676.
46. Appelhans BM, French SA, Pagoto SL, Sherwood NE (2016) Managing temptation in obesity treatment: A neurobehavioral model of intervention strategies. *Appetite* 96:268–279.
47. CDC (2017) New Adult Obesity Maps. *Cent Dis Control Prev*. Available at: <https://www.cdc.gov/obesity/data/prevalence-maps.html> [Accessed March 26, 2018].
48. Vainik U, Neseliler S, Konstabel K, Fellows LK, Dagher A (2015) Eating traits questionnaires as a continuum of a single concept. Uncontrolled eating. *Appetite* 90:229–239.
49. Fjell AM, et al. (2015) Development and aging of cortical thickness correspond to genetic organization patterns. *Proc Natl Acad Sci U S A* 112(50):15462–15467.
50. Walhovd KB, Fjell AM, Giedd J, Dale AM, Brown TT (2017) Through Thick and Thin: a Need to Reconcile Contradictory Results on Trajectories in Human Cortical Development. *Cereb Cortex* 27(2):1472–1481.

467

Figures

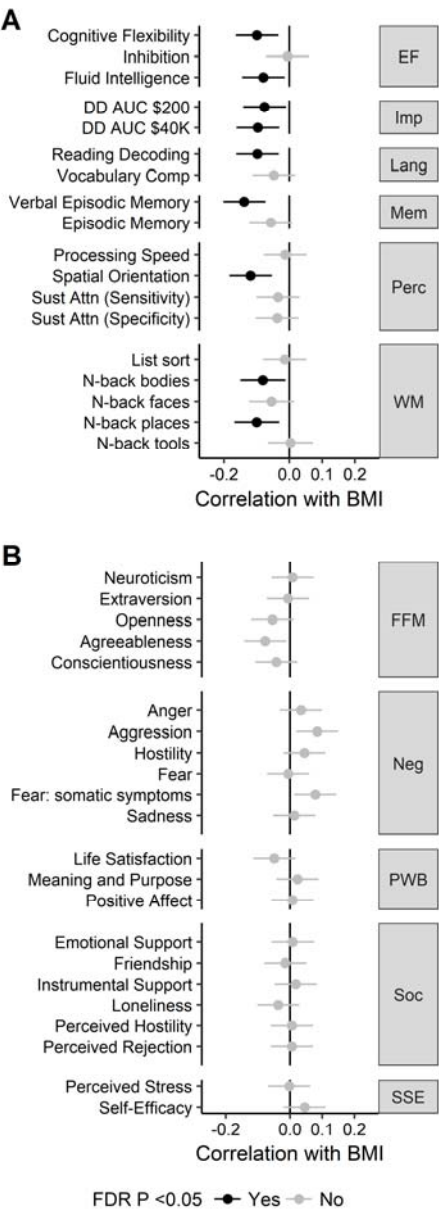

468

469 Figure 1. Associations between body mass index (BMI) and (A) cognitive test scores, and (B)  
470 personality traits (B). Error bars represent 95% confidence intervals. See Table S2 for  
471 explanation of cognitive tests. Numerical values are reported in Table S3. EF=executive function;  
472 FFM=Five-Factor Model; FDR=false discovery rate; Imp=(lack of) impulsivity; Lang=language;  
473 Mem=memory; Neg=negative affect; Perc=perception; PWB=psychological well-being;  
474 Soc=social relationships; SSE=stress and self efficacy; WM=working memory.

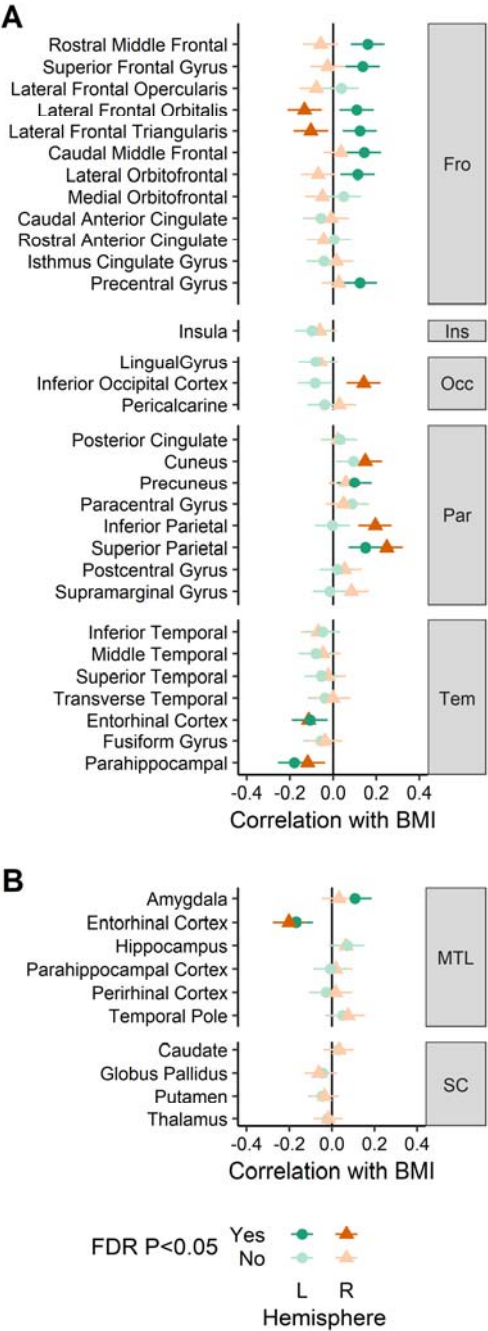

Figure 2. Associations between body mass index (BMI) and brain morphometry. (A) cortical thickness. (B) medial temporal and subcortical regional brain volume. Error bars represent 95% confidence intervals. Numerical values are reported in SI Table S2. FDR=false discovery rate; Fro=frontal, Ins=insula; L=left; Occ=occipital; Par=parietal; R=right; Tem=temporal; MTL=medial temporal lobe; SC=subcortical.

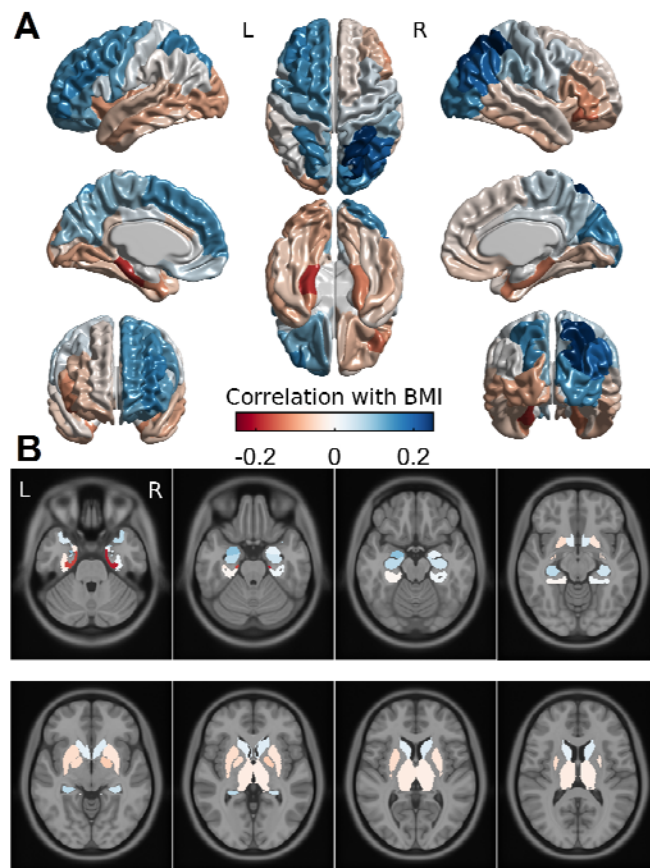

Figure 3. Brain maps of the associations between body mass index (BMI) and (A) cortical thickness and (B) medial temporal and subcortical regional brain volume on a standard brain template in MNI space. Values are the same as in Figure 2. Colour bar applies to both sub-plots. L=left; R=right.

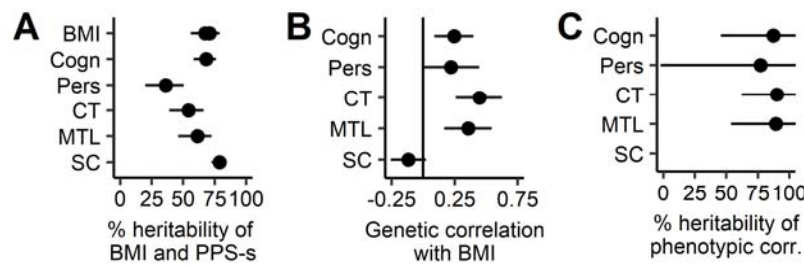

Figure 4. Heritability analysis of the association between poly-phenotype scores (PPS) and body mass index (BMI). (A) Heritability of each trait. BMI has multiple estimates, since it was entered into a bivariate analysis with each PPS separately. (B) Genetic correlations between BMI and each PPS. The genetic correlations are positive, because the PPS-s are designed to positively predict BMI. (C) Heritability of the significant phenotypic correlation between BMI and PPS. Horizontal lines depict 95% confidence intervals. Cogn=PPS of cognitive tests; corr=correlation; CT=PPS of cortical thickness; MTL=PPS of medial temporal lobe volume; Pers=PPS of personality tests; SC=PPS of subcortical structure volumes.

## Supplementary Information for

### Neurobehavioural Correlates of Obesity are Largely Heritable

Uku Vainik , Travis Baker , Mahsa Dadar , Yashar Zeighami, Andréanne Michaud, Yu Zhang,  
José C. García Alanis, Bratislav Misic, D. Louis Collins, Alain Dagher

Alain Dagher corresponding author name here

Email: [alain.dagher@mcgill.ca](mailto:alain.dagher@mcgill.ca)

#### **This PDF file includes:**

Supplementary text

Figs. S1 to S11

Tables S1

References for SI reference citations

#### **Other supplementary materials for this manuscript include the following:**

Tables S2-S13

## Supplementary Information Text

### Methods

#### Participants

Data were provided by the Human Connectome Project (24) WU-Minn Consortium (Principal Investigators: David Van Essen and Kamil Ugurbil; 1U54MH091657, RRID:SCR\_008749) funded by the 16 NIH Institutes and Centers that support the NIH Blueprint for Neuroscience Research; and by the McDonnell Center for Systems Neuroscience at Washington University,

The analyzed data were split between S900 data release (964 participants) and S1200 data release (236 additional participants). We treated the S900 as the main analysis sample and results from this sample are reported throughout the paper. At times, we used unique participants from the S1200 release for replication, referred to as S1200n. For the main analysis sample, we applied the following exclusion criteria, as these might confound brain-obesity associations: people with missing values on crucial variables, such as age, BMI, education, income, gender, race, and ethnicity (n=6), hypo/hyper thyroidism (n=4), other endocrine problems (n=16), underweight (BMI  $\leq 18$ , n=9), and women who had recently given birth (n=9). In addition, as we used family information to control for participants' relatedness, we excluded participants that were half-siblings to other participants (n=31). The same exclusions were applied to S1200n (n=11).

The final main analysis dataset consisted of 895 participants, demographics of which are summarized in Table 1. The sample had good gender balance and variation in BMI and income. As limitations, the sample was relatively young and well educated, and BMI distribution was slightly less obese compared to current prevalence estimates for Missouri or the US as a whole (MO: 31.7%, US: 36.5%, ref: , 47). Most people were white and non-Hispanic, however other races-ethnicities were also represented. The participants were nested into 384 families, typically having 1 to 3 siblings in the dataset. For comparison, we also provide the same statistics for the S1200n sample, as well as a subset of S1200n sample in which no participant is related to the S900 sample.

For the heritability analysis between each neurocognitive factor and BMI, we randomly chose one sibling pair per family, ensuring that the pair had complete data. Non-twin sibling pairs were considered equivalent to dizygotic twin pairs with respect to heritability analyses once data was

residualized for age and gender. If multiple sibling pairs within a family had complete data, we prioritized choosing monozygotic twin pairs and dizygotic twin pairs over non-twin sibling pairs. Depending on the neurocognitive factor, the heritability analysis was conducted on 46-111 pairs of monozygotic twins (median=97) and 60-202 pairs of dizygotic twins and siblings (median=176).

## Measures

Psychological measures.

Participants completed an extensive set of questionnaires and cognitive tests (see 51, 52 for an overview). In the current analysis, we included 22 questionnaires and 18 cognitive tests (see Figure 2 and Table S2 for complete list). Here we refer to the set of questionnaire results as personality variables, as personality encompasses various patterns of what people want, say, do, feel, or believe (53). Based on our previous review (6) we chose cognitive tests capturing aspects of executive function, memory, and language.

Cortical thickness.

All T1-weighted MRI images were processed using the CIVET pipeline (version 2.0) (29, 54, 55). Processing was executed on the Canadian Brain Imaging Network (CBRAIN) High Performance Computing platform for collaborative sharing and distributed processing of large MRI datasets (56). Briefly, native T1-weighted MRI scans were corrected for non-uniformity using the N3 algorithm (57). The corrected volumes were masked and registered into stereotaxic space, and then segmented into gray matter (GM), white matter (WM), cerebrospinal fluid (CSF) and background using a neural net classifier (58). The white matter and gray matter surfaces were extracted using the Constrained Laplacian-based Automated Segmentation with Proximities algorithm (59, 60). The resulting surfaces were resampled to a stereotaxic surface template to provide vertex based measures of cortical thickness (61). All resulting images were visually inspected for motion artefacts by experienced personnel and then subsequently processed through a stringent quality control protocol, which only 641 of the 894 participants in our initial cohort passed. In the S1200n, 144 of the 214 passed. For those participants who passed, cortical thickness was then measured in native space using the linked distance between the two surfaces across 81924 vertices and a 20mm surface smoothing kernel was applied to the data (62). The Desikan–Killiany–Tourville (DKT) atlas was used to parcellate the surface into 64 cortical regions (63). Cortical thickness was averaged over all vertices in each region of interest for each

subject (64) and the effect of mean cortical thickness was regressed to allow for regional analysis (65). After participant exclusions, data was available for 591/137 participants in the S900/S1200n samples.

Volumetric estimates.

Because the CIVET cortical thickness method does not cover all medial temporal and subcortical structures, we used volumetric estimates for these brain regions. For subcortical volumetric estimation, T1-weighted scans of the subjects were pre-processed through a computerized pipeline (n=899). Image denoising (66), intensity non-uniformity correction (57), and image intensity normalization into range (0-100) using histogram matching were performed. After preprocessing, all images were first linearly (using a 9-parameter rigid registration) and then nonlinearly registered to an average template (MNI ICBM152) as part of the ANIMAL software (30, 67). The subcortical structures, i.e., thalamus, putamen, caudate, and globus pallidus were segmented using ANIMAL by warping segmentations from ICBM152 back to each subject using the obtained nonlinear transformations. The medial temporal lobe structures, i.e. hippocampi, amygdala, temporal pole, and parahippocampal, entorhinal and perirhinal cortices, were segmented using an automated patch-based label-fusion technique (68). The method selects the most similar templates from a library of labelled MRI template images, and combines them with a majority voting scheme to assign the highest weighted label to every voxel to generate a discrete segmentation. Quality control was performed on the individual registered images as well as the automated structure segmentations by visual inspection, and inaccurate results were discarded. In S900, 648 participants passed the quality control for medial temporal lobe structures, and 895 for subcortical structures. Within S1200n, of the 214 participants, 212 passed the quality control for subcortical structures, and 174 passed the quality control for medial temporal lobe. After exclusions, the S900/S1200n samples included data from n=828/204, 8 parcels per subjects for the subcortical structures, and n=594/166, 12 parcels for the medial temporal lobe structures.

## Data Analysis

Analyzing each feature

A schematic pipeline of the analysis is displayed in Figure S1. Data from all neurocognitive factors were first residualized for control variables (age, ethnicity, gender, handedness, race) using linear multiple regression. When presenting phenotypic associations, we used a linear

mixed model, adding a random intercept for family (Figure S1), and also varied the involvement of income and education. As BMI was skewed (long-tail at the upper end of the scale), it was log-transformed to achieve a normal-like distribution. Handedness was also log normalized.

For each factor category (cognition, personality, cortical thickness, medial temporal volume, subcortical volume), factor-BMI relationships were assessed using univariate correlation between each brain parcel or test score and BMI. We initially also tried using a partial least squares (PLS) correlation approach, which is a multivariate technique suited to handling correlated predictors (69, 70). However, the PLS estimates were extremely close to univariate correlations, therefore univariate correlations were preferred for simplicity. As a result, we received an estimate of the relative contribution (weight) of each predictor within a given factor. Estimates used in this study are presented in Table S3.

#### Creating poly-phenotype scores

To summarize effects for each neurocognitive factor, we created an aggregate BMI risk score or *poly-phenotype score (PPS)* for each neurocognitive factor. This was inspired by the polygenic risk score approach, where the effects of single-nucleotide polymorphisms are added up to form a total genetic score (71). Specifically, we used the correlation-derived weights to multiply each participant's measured values, and aggregated the results into a single composite variable for a given factor, the PPS. A PPS would reflect the total association that a given factor has with BMI. Even though only some features within a neurobehavioural factor had significant effects on BMI, and certain features correlated with each other (see SI Tables S4-S8), both our testing (see SI Results) and recommendations by others (72) lead us to not apply p-value cutoffs, clumping, or pruning, as excluding these steps does not hurt predictive ability and improves transparency (72). PPS-s have a mean of 0 but varying standard deviation, depending on the number of features and their effect sizes (Table S9).

We used cross-validation principles to avoid and test for overfitting. Namely, we divided participants into 10% folds. Each 10% fold received the correlation weights from the remaining 90% of the sample. As the result, we received one PPS vector for each factor, where each participant's score was based on out-of-sample prediction. When creating the 10% folds, we created folds for each factor separately, as each factor has a different number of available data points, ensuring that folds were as equal in size as possible. We also ensured that siblings from

the same family were in the same fold. Therefore, no data from family members were used in calculating both the correlation weights and performing out of sample predictions.

To test the robustness of PPS-s, we first tested the impact of not pruning and applying p-value cutoffs. In a pruned PPS, features are omitted that a) correlate above criterion to another feature and b) have lower correlation with BMI than the other feature (73). In a PPS with p-value cut-off, features are omitted that have an above-criterion uncorrected p-value when correlated with BMI. Neither pruning nor a p-value cutoff improved the predictive ability of the PPS-s (see SI Results).

We further tested the predictive ability of PPS scores by applying the weights created on the full S900 release to predict BMI in the S1200n release (new participants only), which we did not touch before predicting. As 101 participants within the S1200n were related to participants in the S900, we also tested the predictive ability in the subset of S1200 that was not related to S900 (n=124).

#### Heritability analysis

In the heritability analysis, a typical behavioural genetics decomposition uses relatedness assumptions between individuals to divide variance in a trait to the following components: genetic variance (A, additive and interactive effects), shared environmental variance (C, family and shared school effects), and unique environmental variance (E, unique experience and measurement error). The assumptions are: 100% of genetic variance shared between monozygotic twins, 50% of genetic variance shared between dizygotic twins and sex-and gender residualized siblings, 100% of family environment shared by all siblings, 0% unique variance shared between siblings. Such decomposition is called univariate heritability.

Besides establishing univariate heritability, one can also conduct heritability analysis on the covariance between two traits. For instance, a genetic correlation is the correlation between the A components of trait 1 and trait 2. A bivariate heritability analysis decomposes the phenotypic correlation between trait 1 and trait 2 into A, C, and E components.

Heritability analysis was conducted on PPS scores not residualized for family structure, as this information is used in heritability modelling. We then ran bivariate heritability analyses separately between each PPS and BMI, which provided univariate heritability estimates of the

PPS-s and BMI, genetic and environmental correlations between the univariate estimates of PPS-s and BMI, and bivariate decomposition of the phenotypic correlation between each PPS and BMI. We used the AE model, since BMI was best explained by an AE model, as opposed to an ACE model, based on Akaike Information Criterion (AIC) (Table S10). Similar AIC patterns were present for bivariate models (Figure S11, Table S13). We report only standardized A estimates in the main results, as in the univariate and bivariate analysis of the AE model, E=100-A. Also, no environmental correlations were significant. All standardized and unstandardized estimates are reported in the supplementary materials (Tables S11-S12).

#### Analysis software

Analysis reported in paper was conducted in Microsoft R Open 3.4.0 (74), using May 2017 version of packages abind, car, caret, cowplot, corrplot, ggplot2, lme4, MuMIn, pbkrtest, plyr, psych, synthpop, tidyr, WriteXLS (75–90). Cortical thickness was plotted using Surfstat (91) in MATLAB (92). Heritability analysis was conducted using OpenMX (93), adapting scripts provided by the Colorado International Twin Workshop (94).

## SI Results

### Control variables

Age, gender and race related to BMI, demonstrating the need for residualizing (Figure S2). Marginal  $R^2$  explaining only fixed effects was 0.07, and conditional  $R^2$  explaining both fixed and random effects was 0.38, highlighting the effect of family structure. When controlling for education and income, education was a significant additional predictor, with total model  $R^2$  being 0.09 and conditional  $R^2$  0.37. Further, controlling for family structure in a nested model as random intercept improved model fit (AIC dropped from 7006 to 6895 / 6978 to 6885 when controlling for education and income), suggesting that family nesting needs to be taken into account.

### Robustness of PPS-s

Similarly to genetic literature (72), we found that pruning features or applying a p-value threshold does not change the predictive ability of the PPS-s (Figures S5 & S6).

To test the generalizability of the PPS approach, we used weights obtained from the full S900 release (Figures S3 right and S4 right) to predict the BMI of new participants in the S1200 release (S1200n, n=236), which were not used in any of the initial assessments. As certain participants in

the S1200n release were related to participants in the S900, we also tested the PPS performance when they were excluded. As can be seen in Figure S7, cortical thickness estimates are very similar, no matter the training or testing dataset. Cognition PPS effect sizes were similar to each other, but did not reach statistical significance in the replication sample (S1200n). Personality PPS had unexpectedly high correlation with BMI in the new data. Further research is needed to determine if such effect sizes would further replicate. Medial temporal lobe PPS-s also did not replicate.

#### Heritability replication

We tested whether the PPS-based bivariate analysis patterns would replicate in the S900 dataset, but using unaggregated top individual features within the PPS-s. We chose the 5 individual features from the top predictors of cognition and cortical thickness. As shown in Figure S8, the individual tasks are comparable with the PPS-s in terms of univariate heritability, genetic correlations, and heritability of phenotypic correlation. However, with genetic correlations, the estimates are non-significant (Figure S8 B1&B2), suggesting that we are not powered to establish significance of the smaller correlations. Further, the standardized estimates for heritability of the phenotypic correlations (Figure S8 C1&C2) are noisier and the estimator often failed at estimating standardized confidence intervals. Such failures at individual feature levels highlight the value of PPS-s, which provide more stable estimates at these sample sizes.

We further used participants only in the S1200n release to replicate the bivariate heritability analysis results in new data. PPS weights were obtained from the S900 release. We focused only on participants who did not have siblings in the S900 release. Granted, the power is low because of fewer complete twin pairs available (29 MZ pairs and 30 DZ pairs). The univariate estimate for BMI heritability was  $A=64\%$  [95% CI: 41%;79%]. In the bivariate analysis, we were also able to replicate the patterns seen in the main dataset (Figure S9), however the confidence intervals were often covering 0 or not estimated, likely due to small sample size.

## Figures

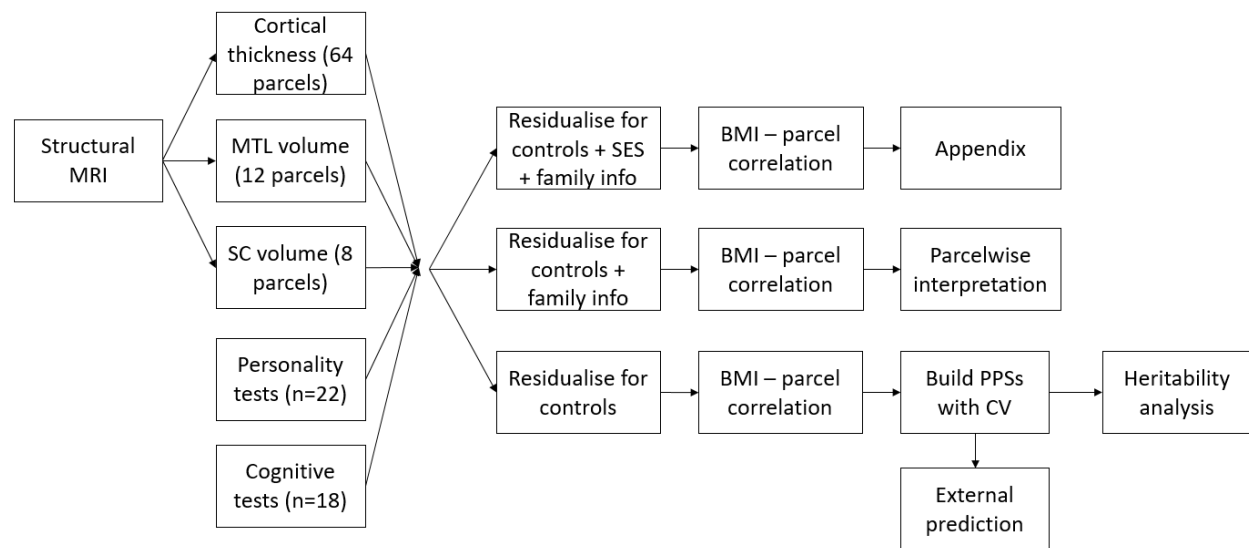

Fig. S1. A schematic diagram of the analysis pipeline. All steps were conducted on all neurocognitive factors separately. BMI=body mass index; CV=cross-validation; MTL=medial temporal lobe; MRI=magnet resonance image; PPS=poly-phenotype score; SC=subcortical; SES=socio-economic status (education and income).

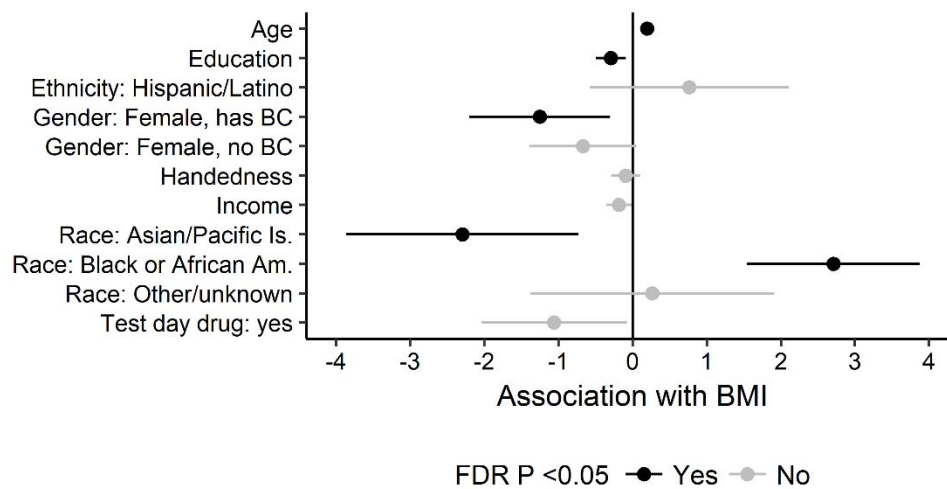

Fig. S2. Regression weights of a multilevel linear model nested for family. Lines mark standard 95% confidence intervals. Intercept is 27.37 (standard error: 2.16). For interpretability, regular BMI is unscaled here. Reference groups: Gender: male, Race: white, Ethnicity: not Hispanic/unknown. Am.=American; BC=birth control; Is.=Islander

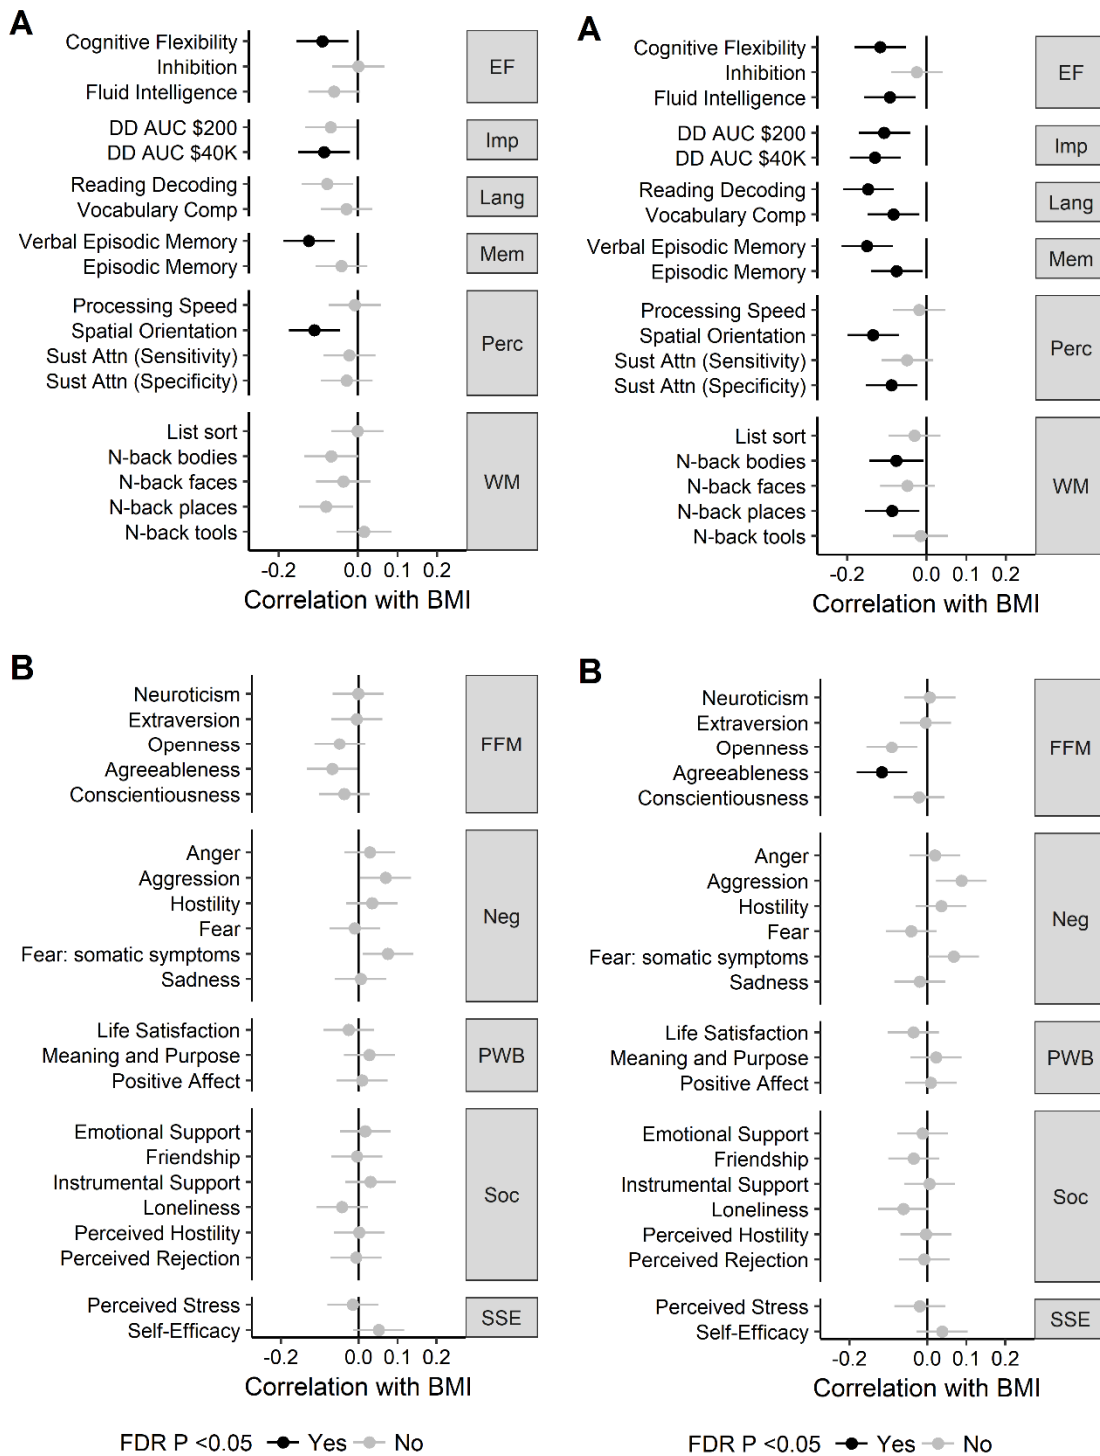

Fig. S3. Associations between body mass index (BMI), cognitive test scores (A), and personality traits (B), either when controlling for education, income, and family structure (left), or not controlling for these variables (right). Error bars mark 95% confidence intervals. See Table S2

746 for explanation of cognitive test names. Numerical values are reported in Table S3. EF=executive  
747 function; FFM=Five-Factor Model; FDR=false discovery rate; Imp=(lack of) impulsivity;  
748 Lang=language; Mem=memory; Neg=negative affect; Perc=perception; PWB=psychological  
749 well-being; Soc=social relationships; SSE=stress and self efficacy; WM=working memory.

750

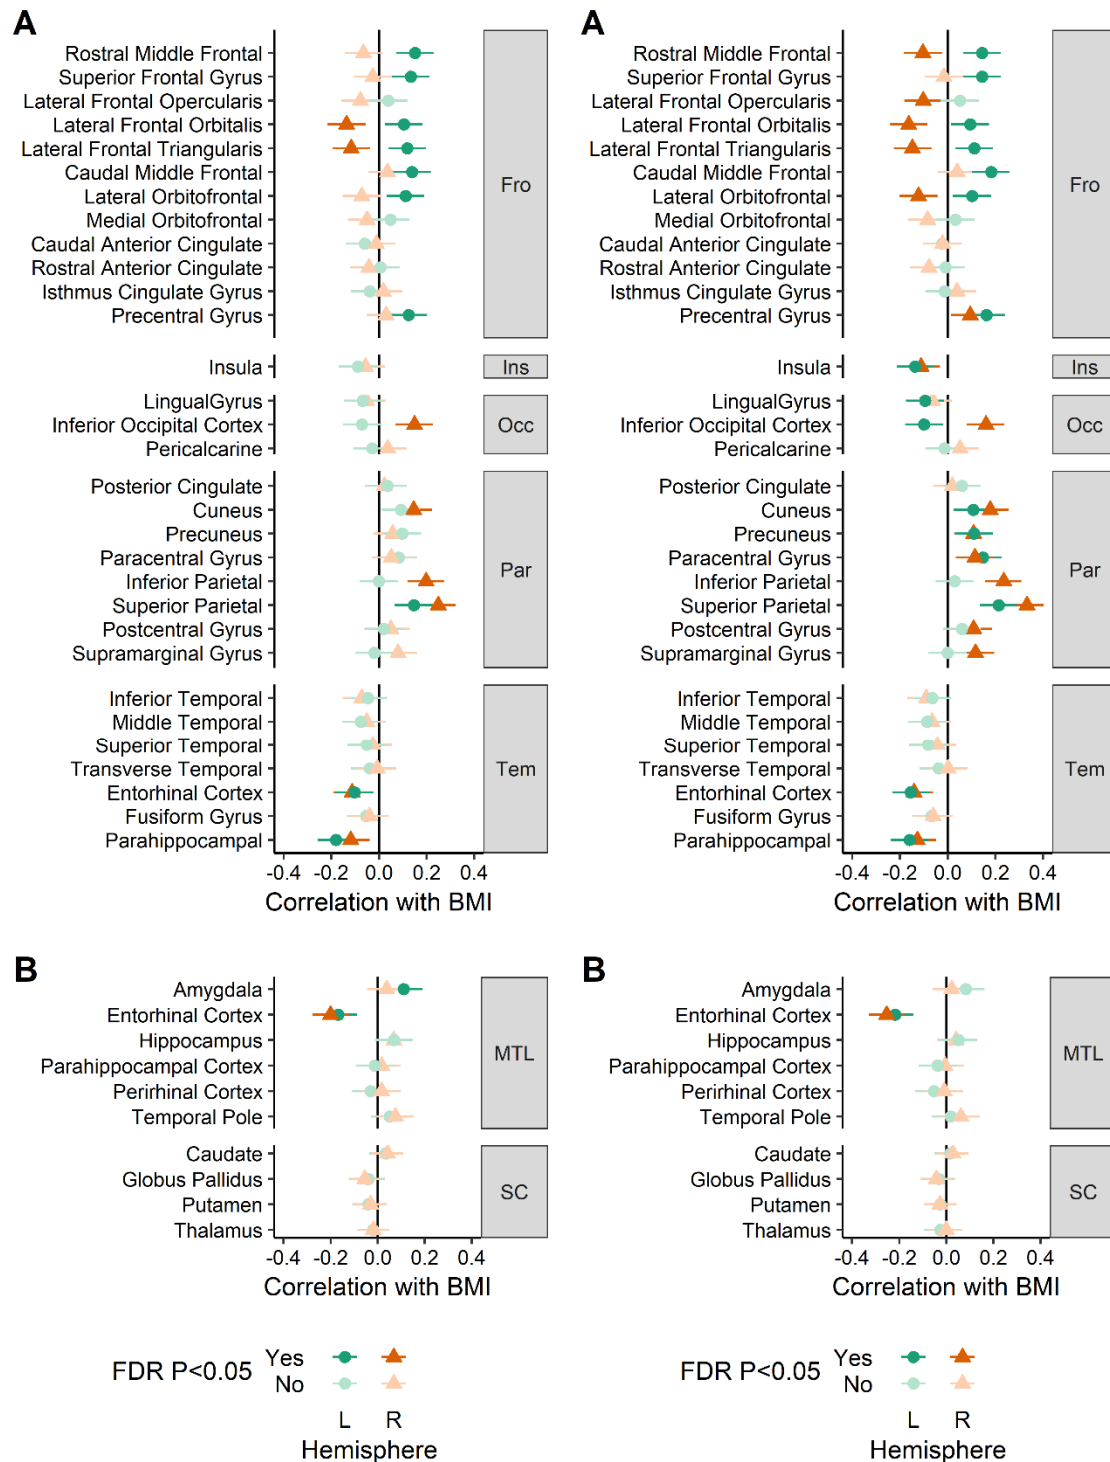

Fig. S4. Associations between body mass index (BMI), cortical thickness (A) and regional brain volume (B), either when controlling for education, income, and family structure (left), or not controlling for these variables (right). Error bars mark 95% confidence intervals. Numerical

755 values are reported in SI Table S3. FDR=false discovery rate; Fro=frontal, Ins=insula; L=left;  
756 Occ=occipital; Par=parietal; R=right; Tem=temporal.

757

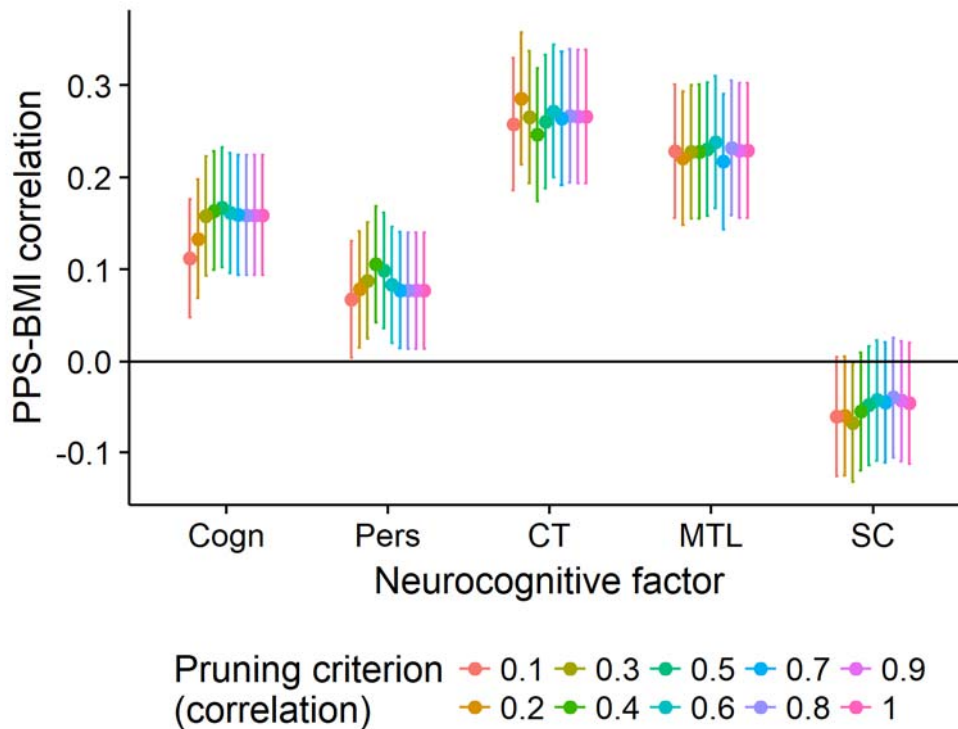

Fig. S5. Low impact of pruning to the poly-phenotype scores' (PPS) associations with BMI. PPS-  
s were trained and tested within the Human Connectome Project's S900 release, using cross-  
validation. Pruning means excluding features that have a higher correlation than set criterion with  
another feature that associates with BMI. A pruning criterion equal to 1 means no pruning was  
done. Cogn=PPS of cognitive tests; CT=PPS of cortical thickness; MTL=PPS of medial temporal  
lobe volume; Pers=PPS of personality tests.

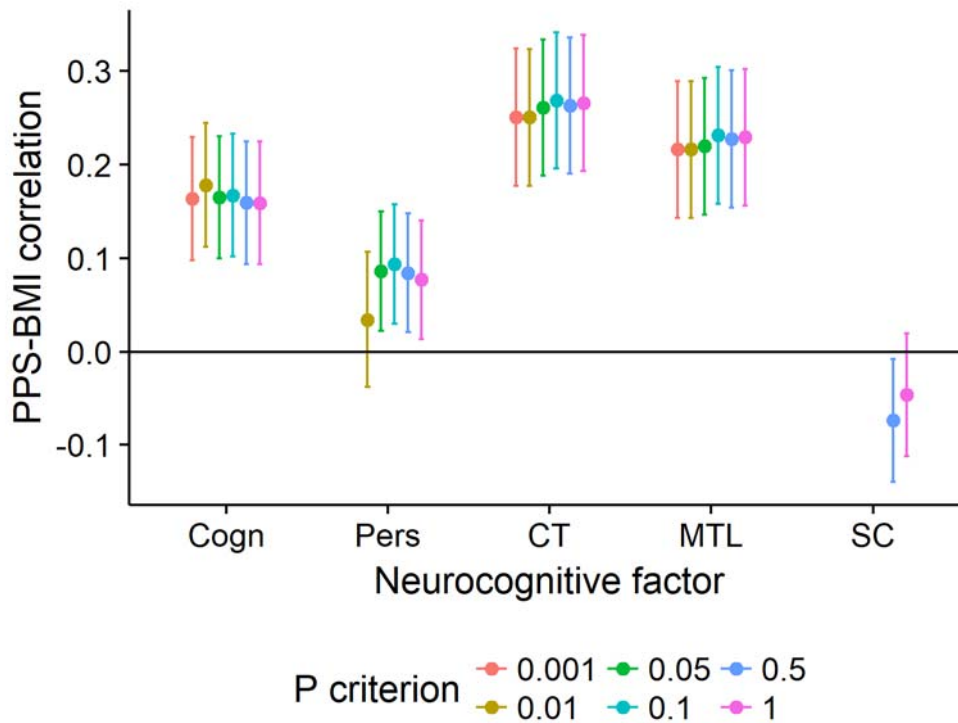

766

767 Fig. S6. Low impact of excluding features by p value to the poly-phenotype scores' (PPS)  
768 associations with BMI. PPS-s were trained and tested within the Human Connectome Project's  
769 S900 release, using cross-validation. Features with a p value higher than criterion were excluded  
770 from the PPS. A p criterion of 1 means no exclusion was done. Cogn=PPS of cognitive tests;  
771 CT=PPS of cortical thickness; MTL=PPS of medial temporal lobe volume; Pers=PPS of  
772 personality tests.

773

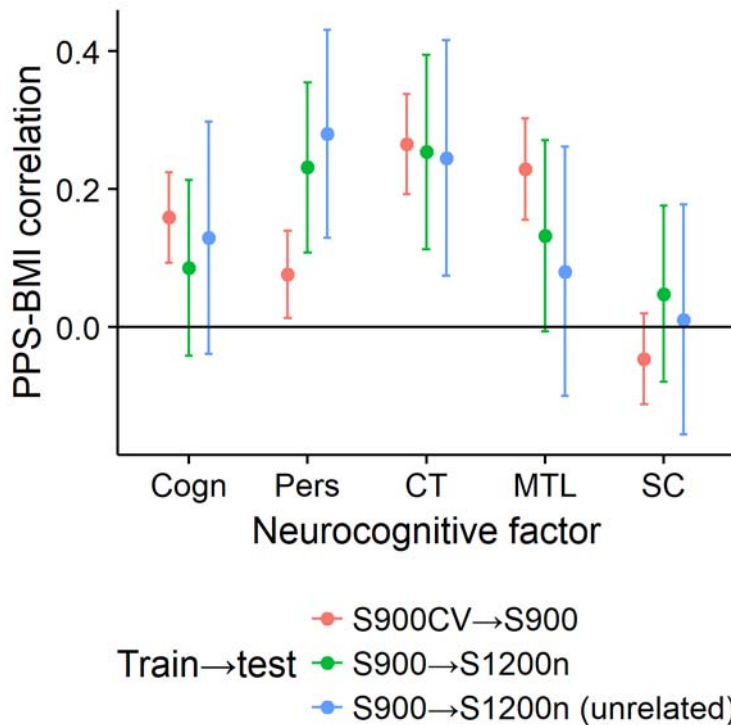

774

775 Fig. S7. Comparison of poly-phenotype scores' (PPS) performance in correlating with BMI,  
776 depending on training data and test data.

777 S900CV→S900: PPS-s within S900 release trained and tested with cross-validation to avoid bias.  
778 These PPS-s are used in heritability analysis.

779 S900→S1200n: PPS-s trained on S900 and tested in full S1200n sample.

780 S900→S1200n (unrelated): PPS-s trained on S900 and tested in S1200n sample not related to  
781 S900.

782 Cogn=PPS of cognitive tests; CT=PPS of cortical thickness; CV=cross-validated; MTL=PPS of  
783 medial temporal lobe volume; Pers=PPS of personality tests; S900 – Participants in Human  
784 Connectome Project's S900 release; S1200n – participants only in the S1200 release; SC=PPS of  
785 subcortical structure volumes.

786

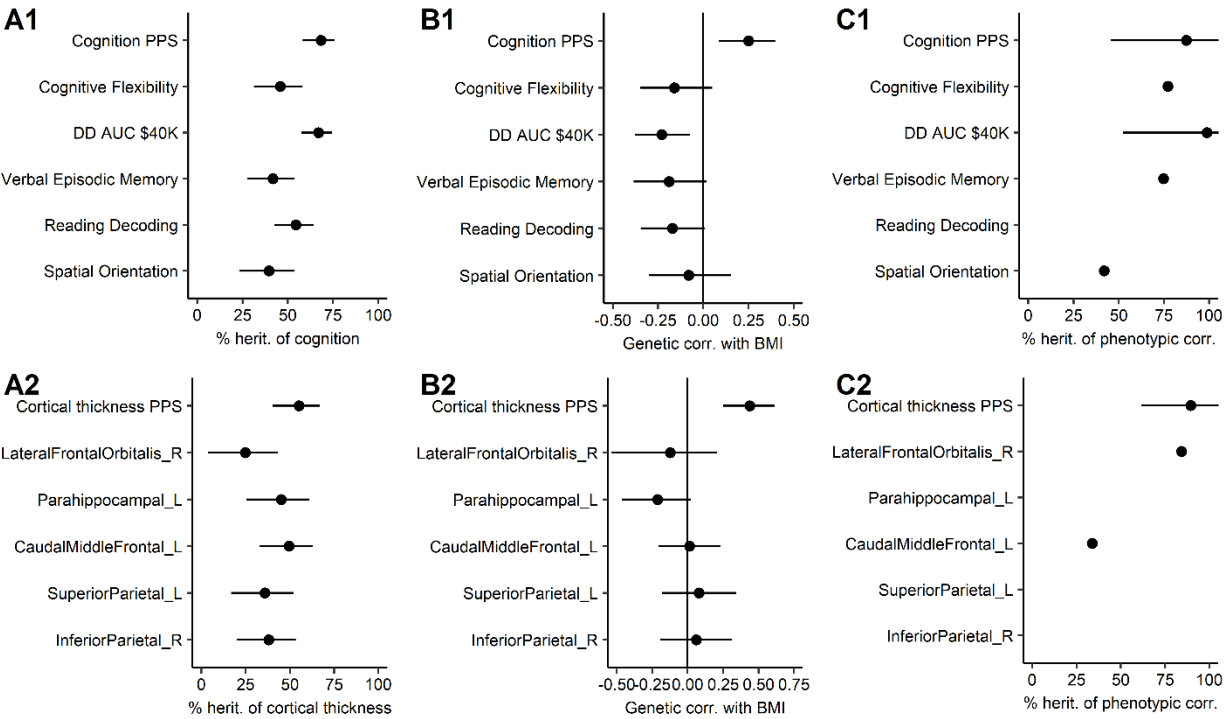

Fig. S8. Heritability analysis of the association between poly-phenotype scores (PPS) of cognitive test scores (A1-C1) and cortical thickness (A2-C2), compared with most significant individual features of each PPS. (A) Heritability of each trait. The effect of unique environment (E) is not shown, since  $E=100-A$ . (B) Genetic correlations between BMI and each PPS or between BMI and each feature. The PPS-based genetic correlations are positive, because the PPS-s are designed to positively predict BMI. However, individual features can have negative genetic correlations. (C) Heritability of the phenotypic correlation between BMI and PPS or between BMI and each feature. Horizontal lines depict 95% confidence intervals. The estimator failed at estimating certain features. Corr=correlation; L=Left hemisphere; herit=heritability; R=right hemisphere.

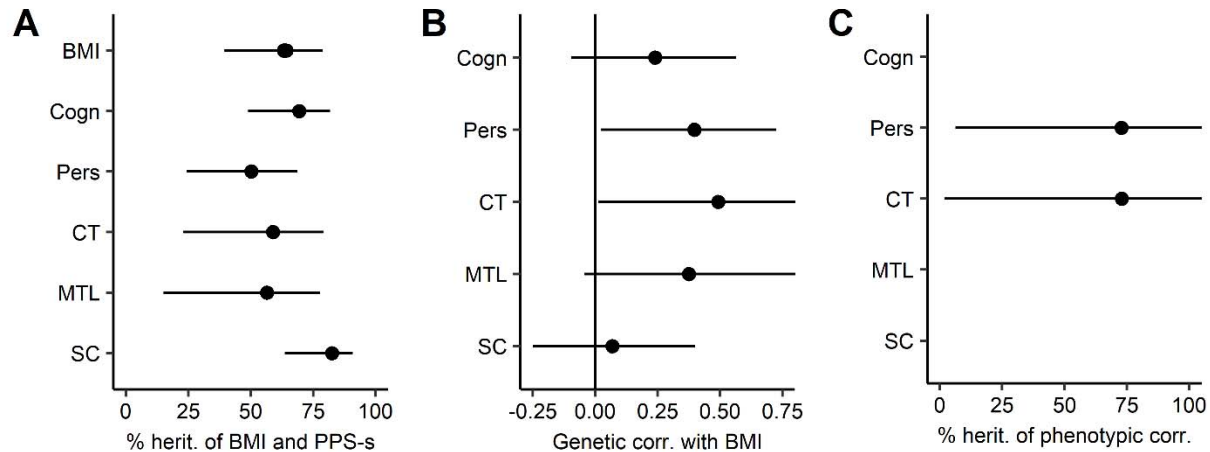

Fig. S9. Heritability analysis of the association between poly-phenotype scores (PPS) and body mass index (BMI) in the S1200n sample unrelated to S900. (A) Heritability of each trait. BMI has multiple estimates, since it was entered into a bivariate analysis with each PPS separately. The effect of unique environment (E) is not shown, since  $E=100-A$ . (B) Genetic correlations between BMI and each PPS. The genetic correlations are positive, because the PPS-s are designed to positively predict BMI. None of the environmental correlations were significant and therefore not shown. (C) Heritability of the phenotypic correlation between BMI and PPS. Horizontal lines depict 95% confidence intervals. Estimates not shown for PPS-s that did not have significant phenotypic association with BMI. Cogn=PPS of cognitive tests; corr=correlation; CT=PPS of cortical thickness; herit=heritability; MTL=PPS of medial temporal lobe volume; Pers=PPS of personality tests; SC=PPS of subcortical structure volumes.

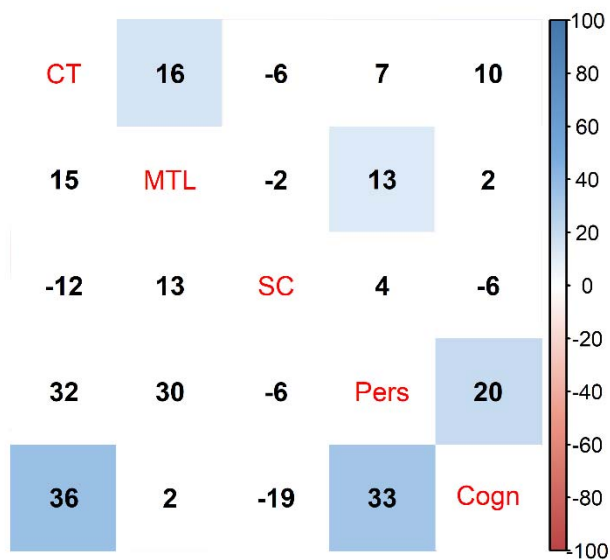

813  
814 Fig. S10. Phenotypic (upper triangle) and genetic (lower triangle) correlations between poly-  
815 phenotype scores (PPS-s) used for heritability analysis. Phenotypic correlations account for  
816 family structure. FDR-corrected significant correlations are highlighted with color. Correlations  
817 are multiplied by 100 for clarity. Cogn=PPS of cognitive tests; corr=correlation; CT=PPS of  
818 cortical thickness; MTL=PPS of medial temporal lobe volume; Pers=PPS of personality tests;  
819 SC=PPS of subcortical structure volumes.

820

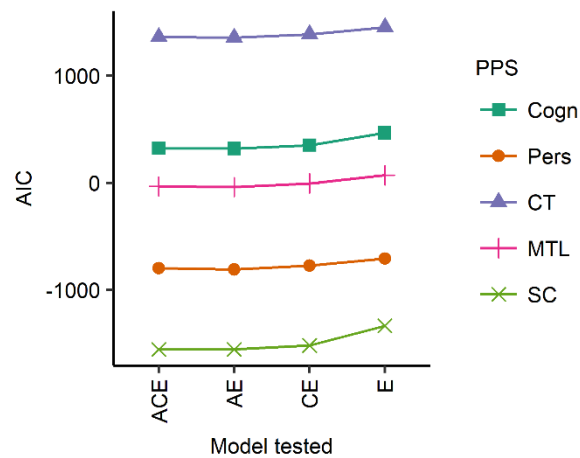

Fig. S11. Akaike Information Criteria (AIC) for BMI-PPS (poly-phenotype score) bivariate heritability decompositions. Cogn=PPS of cognitive tests; corr=correlation; CT=PPS of cortical thickness; MTL=PPS of medial temporal lobe volume; Pers=PPS of personality tests; SC=PPS of subcortical structure volumes.

828 **Table S1. Descriptive statistics of samples analyzed.**

| Variable                    | S900                         | S1200n                       | S1200n<br>unrelated          |
|-----------------------------|------------------------------|------------------------------|------------------------------|
| N                           | 895                          | 225                          | 124                          |
| Age (years)                 | $\bar{x}=28.83$<br>(SD=3.67) | $\bar{x}=28.85$<br>(SD=3.84) | $\bar{x}=29.31$<br>(SD=3.83) |
| BMI (kg/m <sup>2</sup> )    | $\bar{x}=27.27$<br>(SD=5.77) | $\bar{x}=26.51$<br>(SD=5.21) | $\bar{x}=26.32$<br>(SD=5.18) |
| BMI groups                  |                              |                              |                              |
| Normal weight (BMI 18-24.9) | 375 (41.9%)                  | 101 (44.9%)                  | 56 (45.2%)                   |
| Overweight (BMI 25-29.9)    | 285 (31.8%)                  | 74 (32.9%)                   | 45 (36.3%)                   |
| Obese (BMI 30+)             | 235 (26.3%)                  | 50 (22.2%)                   | 23 (18.5%)                   |
| Drug test positive          |                              |                              |                              |
| No                          | 777 (86.8%)                  | 195 (86.7%)                  | 105 (84.7%)                  |
| Yes                         | 118 (13.2%)                  | 30 (13.3%)                   | 19 (15.3%)                   |
| Education (years)           | $\bar{x}=14.85$<br>(SD=1.82) | $\bar{x}=15.06$<br>(SD=1.72) | $\bar{x}=14.83$<br>(SD=1.8)  |
| Ethnicity:                  |                              |                              |                              |
| Hispanic/Latino             | 819 (91.5%)                  | 198 (88%)                    | 114 (91.9%)                  |
| Not Hispanic/Latino/unknown | 76 (8.5%)                    | 27 (12%)                     | 10 (8.1%)                    |
| Families                    | 384                          | 151                          | 66                           |
| 1 sibling                   | 37 (10.4%)                   | 19 (20%)                     | 19 (28.8%)                   |
| 2 siblings                  | 107 (30.1%)                  | 49 (51.6%)                   | 36 (54.5%)                   |
| 3 siblings                  | 163 (45.9%)                  | 20 (21.1%)                   | 11 (16.7%)                   |
| 4 siblings                  | 43 (12.1%)                   | 6 (6.3%)                     | 0 (0%)                       |

|                                       |                               |                               |                               |
|---------------------------------------|-------------------------------|-------------------------------|-------------------------------|
| 5 siblings                            | 5 (1.4%)                      | 1 (1.1%)                      | 0 (0%)                        |
| Gender                                |                               |                               |                               |
| Male                                  | 413 (46.1%)                   | 120 (53.3%)                   | 61 (49.2%)                    |
| Female no birth control               | 143 (16%)                     | 24 (10.7%)                    | 16 (12.9%)                    |
| Female with birth control             | 339 (37.9%)                   | 81 (36%)                      | 47 (37.9%)                    |
| Handedness                            | $\bar{x}=65.07$<br>(SD=45.13) | $\bar{x}=68.93$<br>(SD=41.03) | $\bar{x}=70.73$<br>(SD=36.97) |
| Income                                |                               |                               |                               |
| <\$10,000                             | 65 (7.3%)                     | 16 (7.1%)                     | 9 (7.3%)                      |
| 10K-19,999                            | 79 (8.8%)                     | 12 (5.3%)                     | 9 (7.3%)                      |
| 20K-29,999                            | 116 (13%)                     | 24 (10.7%)                    | 15 (12.1%)                    |
| 30K-39,999                            | 104 (11.6%)                   | 30 (13.3%)                    | 17 (13.7%)                    |
| 40K-49,999                            | 98 (10.9%)                    | 23 (10.2%)                    | 13 (10.5%)                    |
| 50K-74,999                            | 181 (20.2%)                   | 46 (20.4%)                    | 25 (20.2%)                    |
| 75K-99,999                            | 119 (13.3%)                   | 28 (12.4%)                    | 14 (11.3%)                    |
| >=100,000                             | 133 (14.9%)                   | 46 (20.4%)                    | 22 (17.7%)                    |
| Race                                  |                               |                               |                               |
| White                                 | 664 (74.2%)                   | 176 (78.2%)                   | 95 (76.6%)                    |
| Other/unknown                         | 45 (5%)                       | 21 (9.3%)                     | 11 (8.9%)                     |
| Black or African Am.                  | 145 (16.2%)                   | 13 (5.8%)                     | 8 (6.5%)                      |
| Asian/Nat. Hawaiian/Other Pacific Is. | 41 (4.6%)                     | 15 (6.7%)                     | 10 (8.1%)                     |

829 BMI=body mass index; Is=islander; Nat=native

830

831

832 **Additional Tables S2-S11 (separate file)**

833 See first tab of file “SI\_Tables\_2-13.xlsx” for table of contents.

834

835 **SI References**

836 51. Barch DM, et al. (2013) Function in the human connectome: Task-fMRI and individual  
837 differences in behavior. *NeuroImage* 80:169–189.

838 52. Elam J (2017) HCP Data Dictionary Public. Available at:  
839 [https://web.archive.org/web/20170425185833/https://wiki.humanconnectome.org/display/P](https://web.archive.org/web/20170425185833/https://wiki.humanconnectome.org/display/PublicData/HCP+Data+Dictionary+Public+-+500+Subject+Release)  
840 [ublicData/HCP+Data+Dictionary+Public+-+500+Subject+Release](https://web.archive.org/web/20170425185833/https://wiki.humanconnectome.org/display/PublicData/HCP+Data+Dictionary+Public+-+500+Subject+Release) [Accessed April 25,  
841 2017].

842 53. Ozer DJ, Benet-Martínez V (2006) Personality and the Prediction of Consequential  
843 Outcomes. *Annu Rev Psychol* 57(1):401–421.

844 54. BIC (2016) BIC - The McConnell Brain Imaging Centre: CIVET. *McConnell Brain*  
845 *Imaging Cent CIVET*. Available at:  
846 [https://web.archive.org/web/20170505175011/http://www.bic.mni.mcgill.ca/ServicesSoftwa](https://web.archive.org/web/20170505175011/http://www.bic.mni.mcgill.ca/ServicesSoftware/CIVET)  
847 [re/CIVET](https://web.archive.org/web/20170505175011/http://www.bic.mni.mcgill.ca/ServicesSoftware/CIVET) [Accessed December 21, 2016].

848 55. Zijdenbos AP, Forghani R, Evans AC (2002) Automatic “pipeline” analysis of 3-D MRI  
849 data for clinical trials: application to multiple sclerosis. *IEEE Trans Med Imaging*  
850 21(10):1280–1291.

851 56. Sherif T, et al. (2014) CBRAIN: a web-based, distributed computing platform for  
852 collaborative neuroimaging research. *Front Neuroinformatics* 8.  
853 doi:10.3389/fninf.2014.00054.

854 57. Sled JG, Zijdenbos AP, Evans AC (1998) A nonparametric method for automatic correction  
855 of intensity nonuniformity in MRI data. *IEEE Trans Med Imaging* 17(1):87–97.

856 58. Tohka J, Zijdenbos A, Evans A (2004) Fast and robust parameter estimation for statistical  
857 partial volume models in brain MRI. *NeuroImage* 23(1):84–97.

858 59. Kim JS, et al. (2005) Automated 3-D extraction and evaluation of the inner and outer  
859 cortical surfaces using a Laplacian map and partial volume effect classification.  
860 *NeuroImage* 27(1):210–221.

861 60. MacDonald D, Kabani N, Avis D, Evans AC (2000) Automated 3-D Extraction of Inner and  
862 Outer Surfaces of Cerebral Cortex from MRI. *NeuroImage* 12(3):340–356.

863 61. Lyttelton O, Boucher M, Robbins S, Evans A (2007) An unbiased iterative group  
864 registration template for cortical surface analysis. *NeuroImage* 34(4):1535–1544.

865 62. Lerch JP, Evans AC (2005) Cortical thickness analysis examined through power analysis

- 866 and a population simulation. *NeuroImage* 24(1):163–173.
- 867 63. Klein A, Tourville J (2012) 101 Labeled Brain Images and a Consistent Human Cortical  
868 Labeling Protocol. *Front Neurosci* 6. doi:10.3389/fnins.2012.00171.
- 869 64. He Y, Chen ZJ, Evans AC (2007) Small-world anatomical networks in the human brain  
870 revealed by cortical thickness from MRI. *Cereb Cortex N Y N 1991* 17(10):2407–2419.
- 871 65. Eyler LT, et al. (2012) A Comparison of Heritability Maps of Cortical Surface Area and  
872 Thickness and the Influence of Adjustment for Whole Brain Measures: A Magnetic  
873 Resonance Imaging Twin Study. *Twin Res Hum Genet Off J Int Soc Twin Stud* 15(3):304–  
874 314.
- 875 66. Coupe P, et al. (2008) An optimized blockwise nonlocal means denoising filter for 3-D  
876 magnetic resonance images. *IEEE Trans Med Imaging* 27(4):425–441.
- 877 67. Collins DL, Neelin P, Peters TM, Evans AC (1994) Automatic 3D intersubject registration  
878 of MR volumetric data in standardized Talairach space. *J Comput Assist Tomogr* 18(2):192–  
879 205.
- 880 68. Weier K, Fonov V, Lavoie K, Doyon J, Collins DL (2014) Rapid automatic segmentation of  
881 the human cerebellum and its lobules (RASCAL)—Implementation and application of the  
882 patch-based label-fusion technique with a template library to segment the human  
883 cerebellum. *Hum Brain Mapp* 35(10):5026–5039.
- 884 69. Krishnan A, Williams LJ, McIntosh AR, Abdi H (2011) Partial Least Squares (PLS)  
885 methods for neuroimaging: a tutorial and review. *NeuroImage* 56(2):455–475.
- 886 70. McIntosh AR, Bookstein FL, Haxby JV, Grady CL (1996) Spatial pattern analysis of  
887 functional brain images using partial least squares. *NeuroImage* 3(3 Pt 1):143–157.
- 888 71. Dudbridge F (2013) Power and predictive accuracy of polygenic risk scores. *PLoS Genet*  
889 9(3):e1003348.
- 890 72. Ware EB, et al. (2017) Heterogeneity in polygenic scores for common human traits.  
891 *bioRxiv*:106062.
- 892 73. Dudbridge F, Newcombe PJ (2015) Accuracy of Gene Scores when Pruning Markers by  
893 Linkage Disequilibrium. *Hum Hered* 80(4):178–186.
- 894 74. R Core Team (2013) R: A language and environment for statistical computing. R  
895 Foundation for Statistical Computing, Vienna, Austria. Available at: [http://www.R-](http://www.R-project.org/)  
896 [project.org/](http://www.R-project.org/) [Accessed June 5, 2015].
- 897 75. Bates DM (2010) lme4: Mixed-effects modeling with R. URL *Http*lme4 R-Forge R-Proj  
898 *Orgbook*. Available at: [http://www.wordlatex.com/static/templates/pdf/book\\_B.pdf](http://www.wordlatex.com/static/templates/pdf/book_B.pdf)  
899 [Accessed February 23, 2015].

- 900 76. Fox J, Weisberg HS (2010) *An R Companion to Applied Regression* (SAGE Publications,  
901 Inc, Thousand Oaks, Calif). Second Edition edition Available at:  
902 <http://socserv.socsci.mcmaster.ca/jfox/Books/Companion/>.
- 903 77. Revelle W (2014) psych: Procedures for personality and psychological research. *Northwest*  
904 *Univ Evanst R Package Version 1(1)*.
- 905 78. Wei T, Simko V (2016) *corrplot: Visualization of a Correlation Matrix* Available at:  
906 <https://cran.r-project.org/web/packages/corrplot/index.html> [Accessed January 25, 2017].
- 907 79. Wickham H (2009) *Ggplot2: elegant graphics for data analysis* (Springer, New York).
- 908 80. Wickham H (2011) The Split-Apply-Combine Strategy for Data Analysis. *J Stat Softw*  
909 40(1). doi:10.18637/jss.v040.i01.
- 910 81. Wickham H, RStudio (2017) *tidyr: Easily Tidy Data with “spread()” and “gather()”*  
911 *Functions* Available at: <https://cran.r-project.org/web/packages/tidyr/index.html> [Accessed  
912 May 5, 2017].
- 913 82. Wilke CO, Wickham H (2016) *cowplot: Streamlined Plot Theme and Plot Annotations for*  
914 *“ggplot2”* Available at: <https://cran.r-project.org/web/packages/cowplot/index.html>  
915 [Accessed May 5, 2017].
- 916 83. Bartoń K (2016) *MuMIn: Multi-Model Inference* Available at: [https://cran.r-](https://cran.r-project.org/web/packages/MuMIn/index.html)  
917 [project.org/web/packages/MuMIn/index.html](https://cran.r-project.org/web/packages/MuMIn/index.html).
- 918 84. Halekoh U, Højsgaard S (2014) A kenward-roger approximation and parametric bootstrap  
919 methods for tests in linear mixed models—the R package pbkrtest. *J Stat Softw* 59(9):1–32.
- 920 85. Heiberger TP and R (2016) *abind: Combine Multidimensional Arrays* Available at:  
921 <https://CRAN.R-project.org/package=abind> [Accessed March 26, 2018].
- 922 86. Wing MKC from J, et al. (2017) *caret: Classification and Regression Training* Available at:  
923 <https://CRAN.R-project.org/package=caret> [Accessed March 26, 2018].
- 924 87. Nowok B, Raab GM, Dibben C (2016) synthpop: Bespoke Creation of Synthetic Data in  
925 R. *J Stat Softw* 74(11). doi:10.18637/jss.v074.i11.
- 926 88. Phillips N (2017) *yarr: A Companion to the e-Book “YaRrr!: The Pirate’s Guide to R”*  
927 Available at: <https://cran.r-project.org/web/packages/yarr/index.html> [Accessed February  
928 13, 2017].
- 929 89. Therneau TM, Daniel S, Sinnwell J, Atkinson E (2015) *kinship2: Pedigree Functions*  
930 Available at: <https://cran.r-project.org/web/packages/kinship2/index.html>.
- 931 90. Schwartz M (2015) *WriteXLS: Cross-Platform Perl Based R Function to Create Excel 2003*  
932 *(XLS) and Excel 2007 (XLSX) Files* Available at: [https://CRAN.R-](https://CRAN.R-project.org/package=WriteXLS)  
933 [project.org/package=WriteXLS](https://CRAN.R-project.org/package=WriteXLS) [Accessed March 28, 2018].

- 934 91. Worsley K, et al. (2009) Surfstat: A Matlab toolbox for the statistical analysis of univariate  
935 and multivariate surface and volumetric data using linear mixed effects models and random  
936 field theory. *NeuroImage* 47 (Supplement 1), S102–S102, Organization for Human Brain  
937 Mapping. *2009 Annual Meeting*.
- 938 92. MATLAB (2016) (The MathWorks Inc., Natick, MA).
- 939 93. Neale MC, et al. (2016) OpenMx 2.0: Extended Structural Equation and Statistical  
940 Modeling. *Psychometrika* 81(2):535–549.
- 941 94. Institute for Behavioral Genetics (2017) International Behavioral Genetics Workshop.  
942 Available at:  
943 [https://web.archive.org/web/20170426173719/http://www.colorado.edu/ibg/international-](https://web.archive.org/web/20170426173719/http://www.colorado.edu/ibg/international-behavioral-genetics-workshop)  
944 [behavioral-genetics-workshop](https://web.archive.org/web/20170426173719/http://www.colorado.edu/ibg/international-behavioral-genetics-workshop) [Accessed March 28, 2017].
- 945
- 946
